# Supplementary material for: Acid-sensing ion channel 1a contributes to the effect of extracellular acidosis on NLRP1 inflammasome activation in cortical neurons
Source: J Neuroinflammation. 2015 Dec 30;12:246. doi: 10.1186/s12974-015-0465-7 (PMC4696203; doi:10.1186/s12974-015-0465-7)
Supplement: Additional file 3: Figure S3. — The effect of pH 6.0 extracellular medium on BK currents and [K+]i in cortical neurons. Representative traces and statistical results showing pH 6.0 extracellular medium increased BK currents from 1.29 ± 0.1 to 1.99 ± 0.19 nA (A) and reduced [K+]i to 65.16 ± 5.77 % (B). Data are expressed as means ± SEM. n = 6, # p < 0.05 vs control and *p < 0.05 vs pH 6.0. (PDF 155 kb) [file 12974_2015_465_MOESM3_ESM.pdf]

### Additional file 3

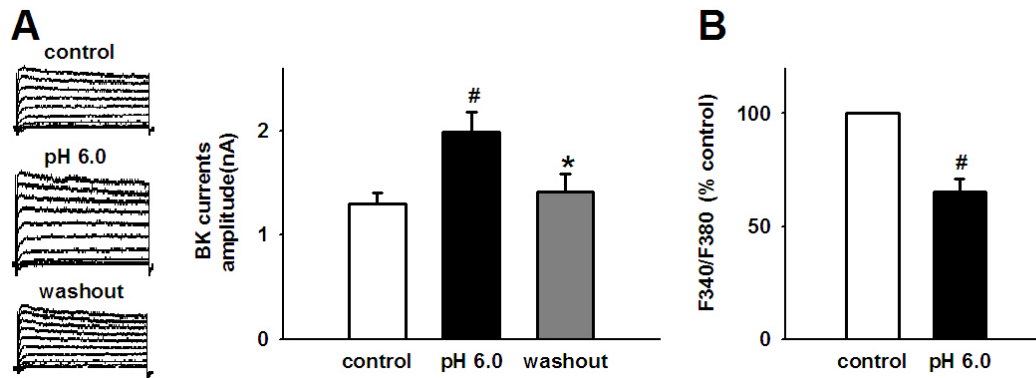

**SFig3.** The effect of pH 6.0 extracellular medium on BK currents and  $[K^+]_i$  in cortical neurons. Representative traces and statistical results showing pH 6.0 extracellular medium increased BK currents from  $1.29 \pm 0.1$  nA to  $1.99 \pm 0.19$  nA (A) and reduced  $[K^+]_i$  to  $65.16 \pm 5.77$  % (B). Data are expressed as means  $\pm$  SEM. n=6, <sup>#</sup>p < 0.05 vs control and <sup>\*</sup>p < 0.05 vs pH 6.0.
